# Supplementary material for: Native mass spectrometry reveals DltA catalysis, DltC loading, and inhibition in the d-alanylation pathway
Source: Royal Society of Chemistry journal article supplement (doi:10.1039/d6ra04213a), 2026-06-02

**Native mass spectrometry reveals DltA catalysis, DltC loading, and inhibition in the D-alanylation pathway**

Yi Wang<sup>1</sup>, Hannah Squires<sup>1</sup>, Marian Aba Addo<sup>2</sup>, Josph P Gerdt<sup>2</sup>, Tarick J El-Baba<sup>3,4</sup>, R Craig MacLean<sup>5</sup>, Carol V Robinson<sup>3,4</sup>, Jani R Bolla<sup>1\*</sup>

<sup>1</sup>*Department of Biochemistry, University of Oxford, Oxford, OX1 3QU*

<sup>2</sup>*Department of Chemistry, Indiana University Bloomington IN 47405 USA*

<sup>3</sup>*Department of Chemistry, University of Oxford, Oxford, OX1 3QZ*

<sup>4</sup>*Kavli Institute for Nanoscience Discovery, University of Oxford, Oxford, OX1 3QU*

<sup>5</sup>*Department of Biology, University of Oxford, Oxford, OX1 3RB*

*\*Correspondence: Jani R Bolla (jani.bolla@bioch.ox.ac.uk)*

**Running title:** Native mass spectrometry reveals DltA-catalysed activation of D-alanine and DltC loading in the D-alanylation pathway

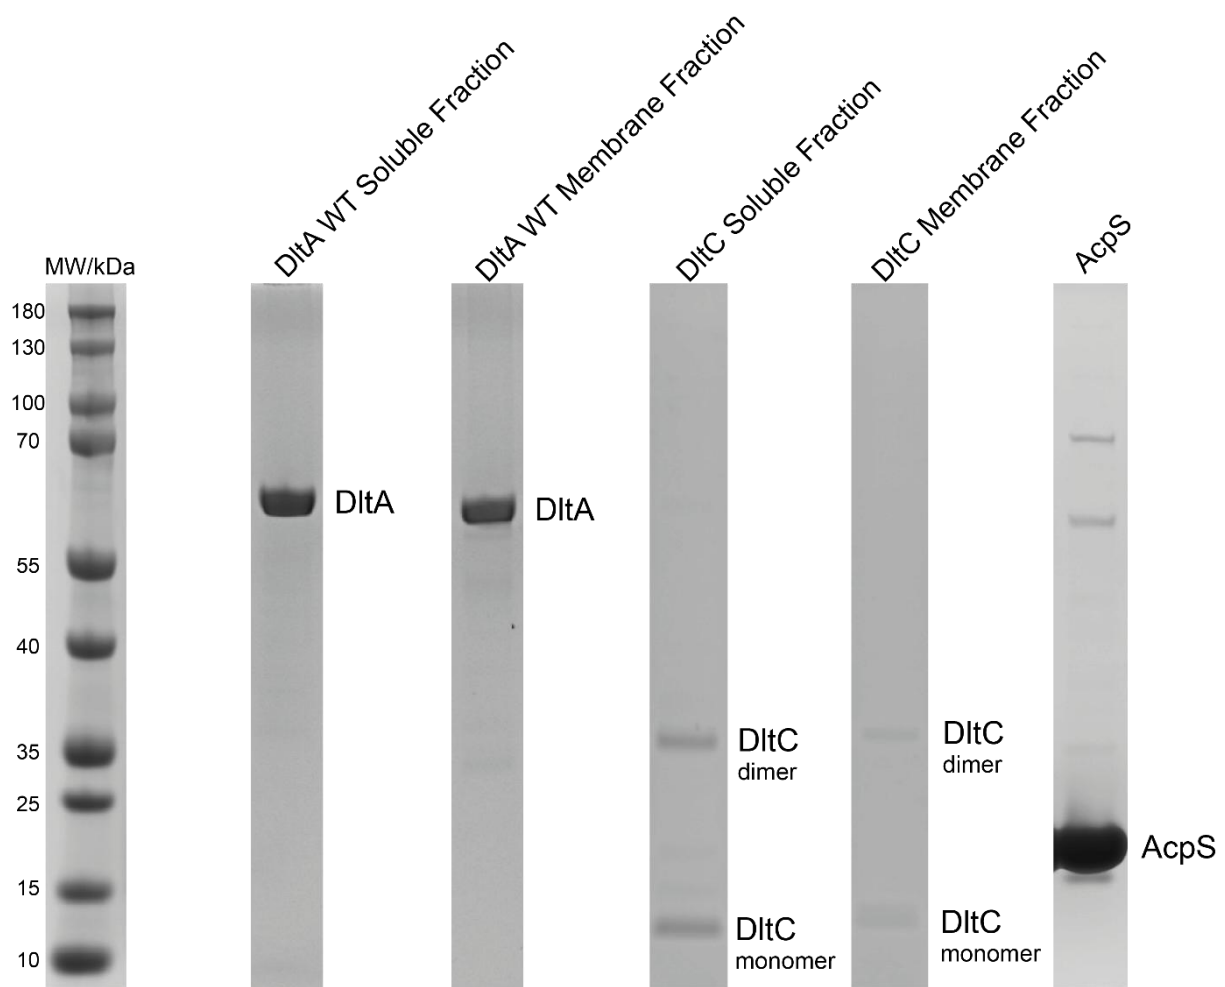

**Figure S1: DltA and DltC can be purified from both soluble and membrane fractions.** SDS-PAGE analyses of purified proteins. Both DltA and DltC can be purified from soluble and membrane fractions to similar purity levels. The gels were run under non-reducing conditions. All proteins show bands at their expected mass range. The ladder used here is the Precision Plus Protein Unstained Standards from BIO-RAD™.

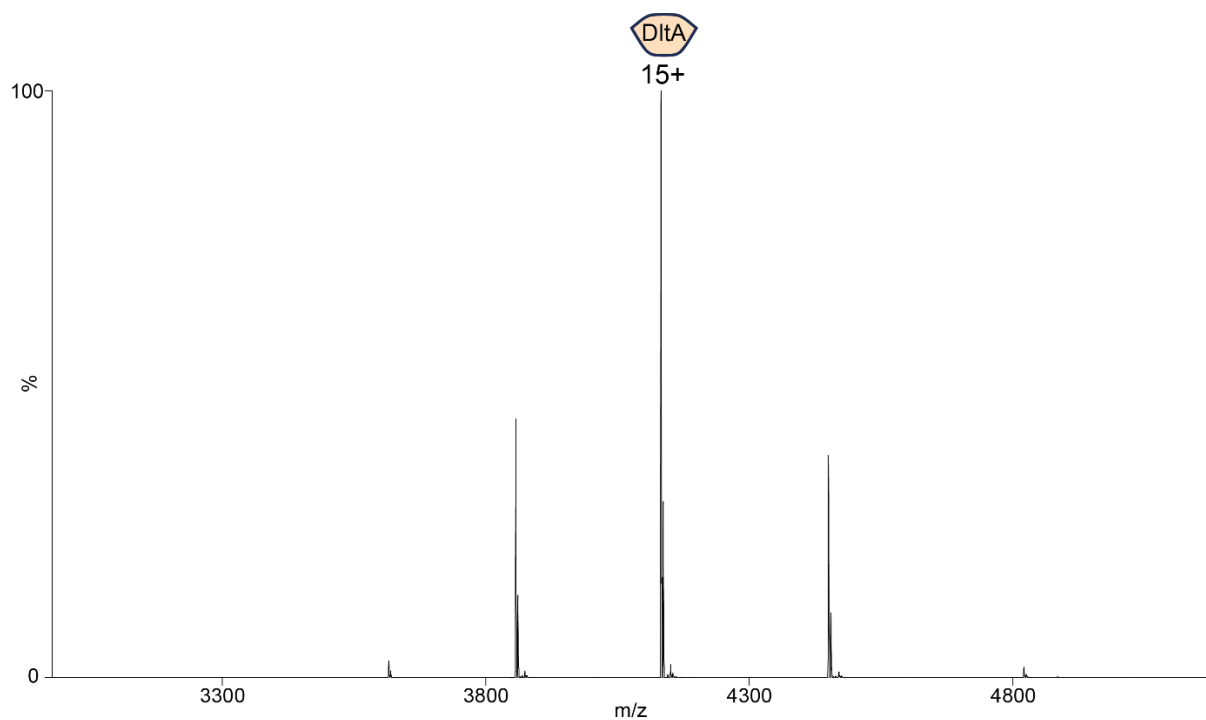

**Figure S2: Native MS analysis of DltA.** The protein was liberated from a buffer containing 200 mM ammonium acetate (pH 8.0) using a collisional activation of 50 V. The spectrum shows a charge state series whose mass corresponds to monomeric DltA. Theoretical and measured masses are listed in Table S2.

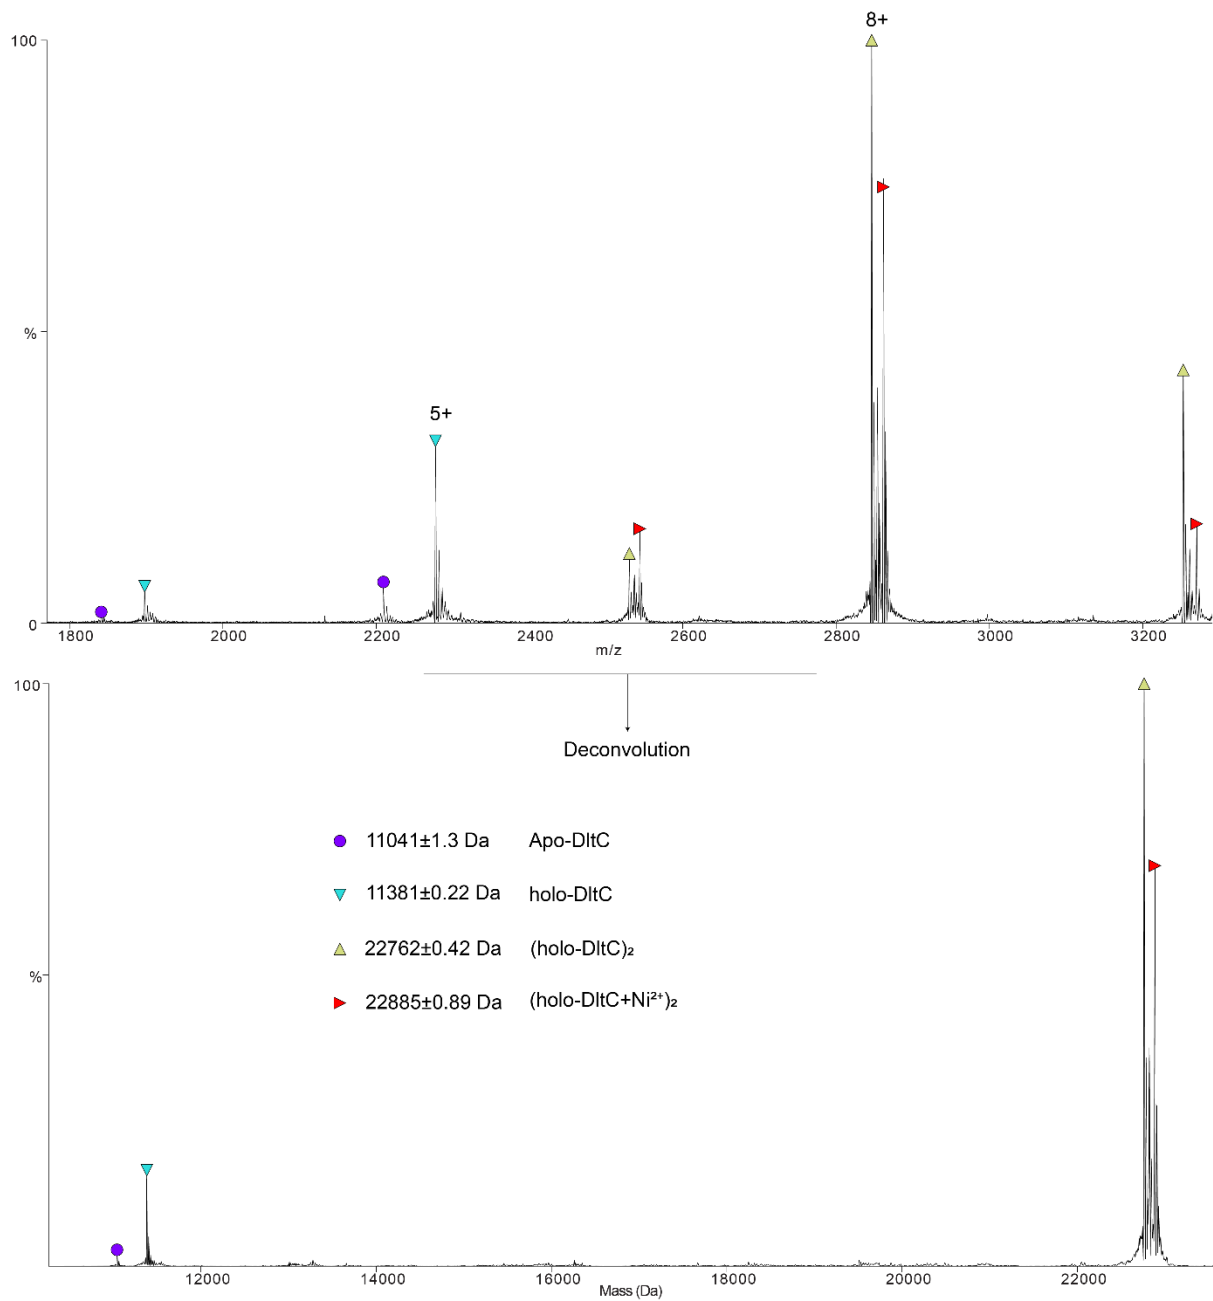

**Figure S3: DltC is in monomer-dimer equilibrium.** Native mass spectrum of purified DltC shows several charge state series corresponding to monomeric apo-DltC, holo-DltC and dimeric *holo*-DltC (top panel). Bottom panel show the deconvoluted masses.

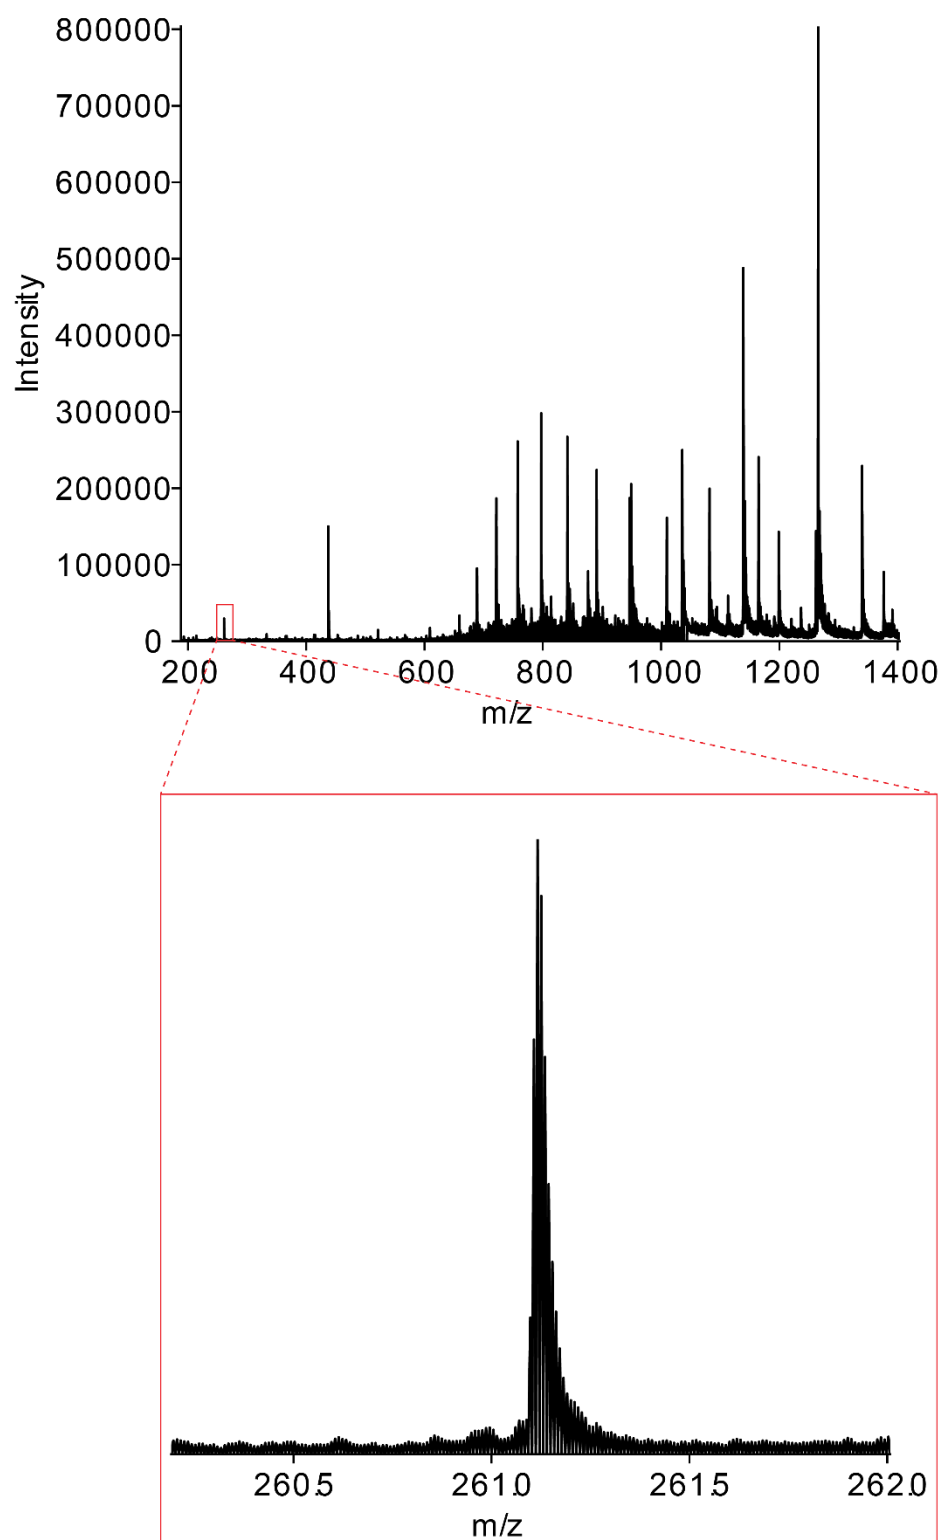

**Figure S4: Detection of P-pant ejection from *holo*-DltC.** Denaturing mass spectrometry of purified DltC shows a characteristic phosphopantetheine fragment ion at  $m/z$  261.1, consistent with ejection of the P-pant moiety from *holo*-DltC.

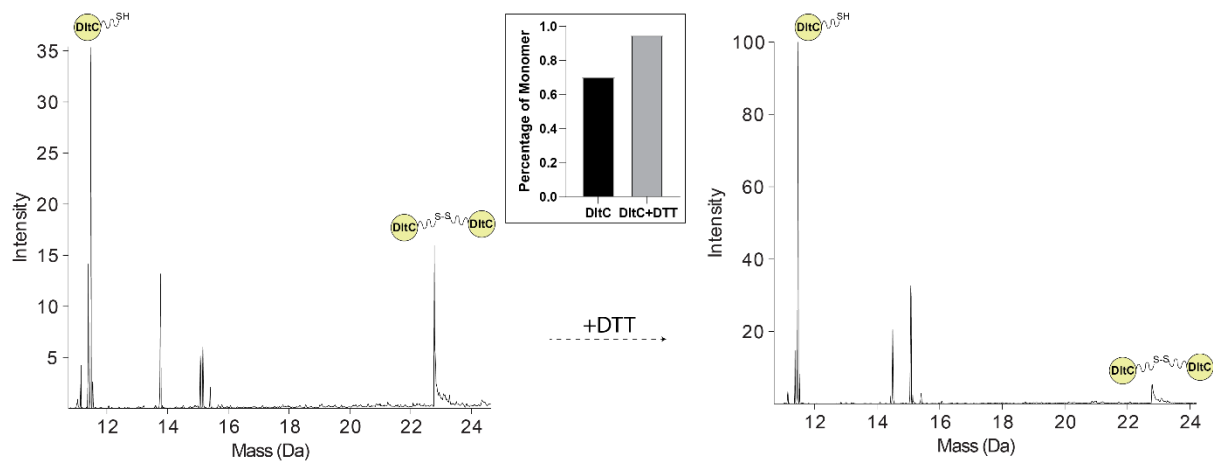

**Figure S5: DTT disrupts the disulfide-linked *holo*-DltC dimer.** Deconvoluted denaturing mass spectra of *holo*-DltC in the presence or absence of DTT show that DTT treatment increases the population of monomeric DltC.

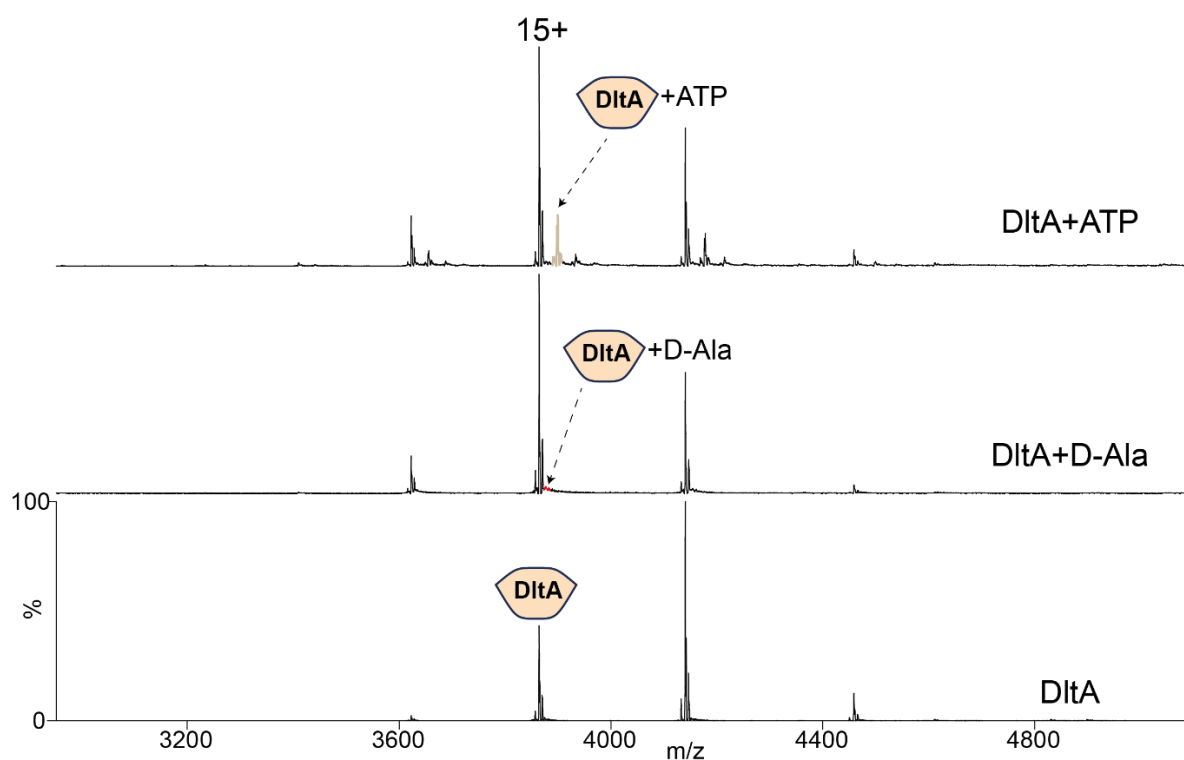

**Figure S6: Binding of DltA with its substrates.** Mass spectra of DltA in the absence (bottom) and presence of its substrates, D-ala (middle) and ATP (top). Adduct peaks are highlighted to show the non-covalent interaction between the protein and substrates. Theoretical and measured masses are listed in Table S3.

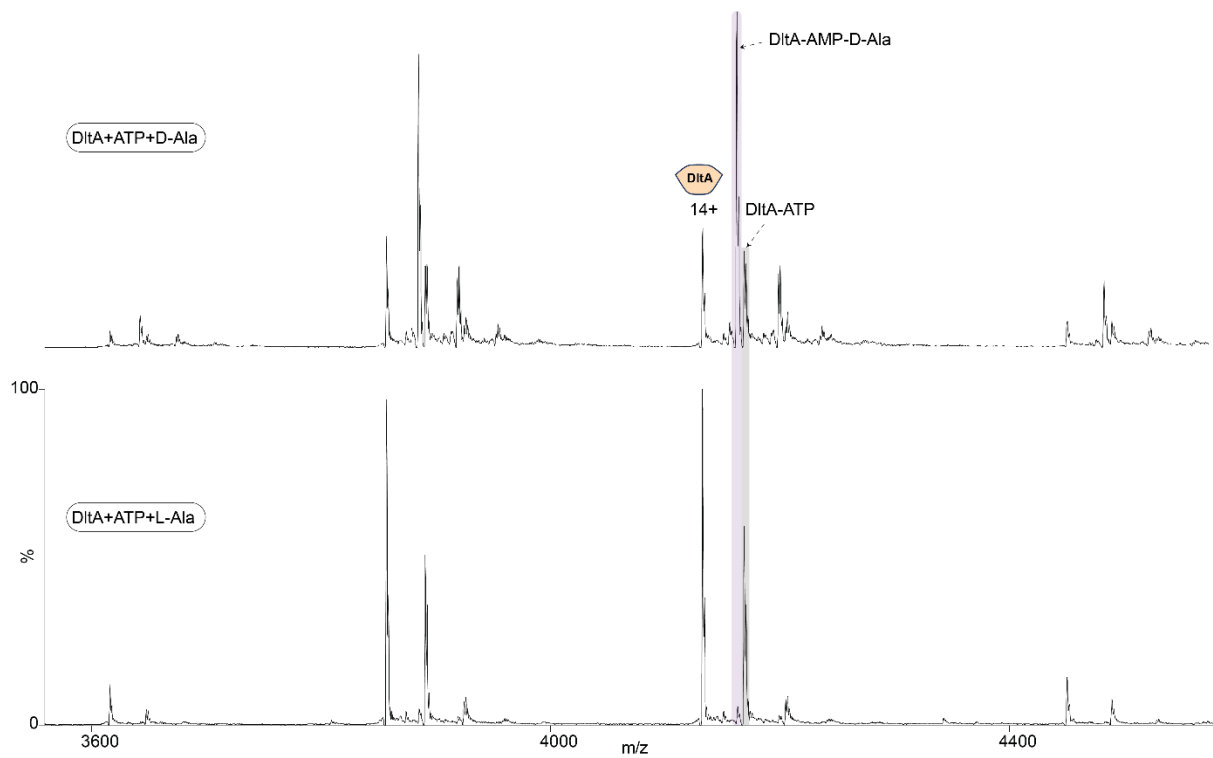

**Figure S7: DltA prefers D-Ala over L-Ala for adenylation.** Mass spectra of DltA in the presence of L-Ala (bottom) and D-Ala (top). Adduct peaks corresponding to successful adenylation can only be observed in the case of D-Ala (highlighted), but with little to no adenylation in the case of L-Ala. Theoretical and measured masses are listed in Table S3.

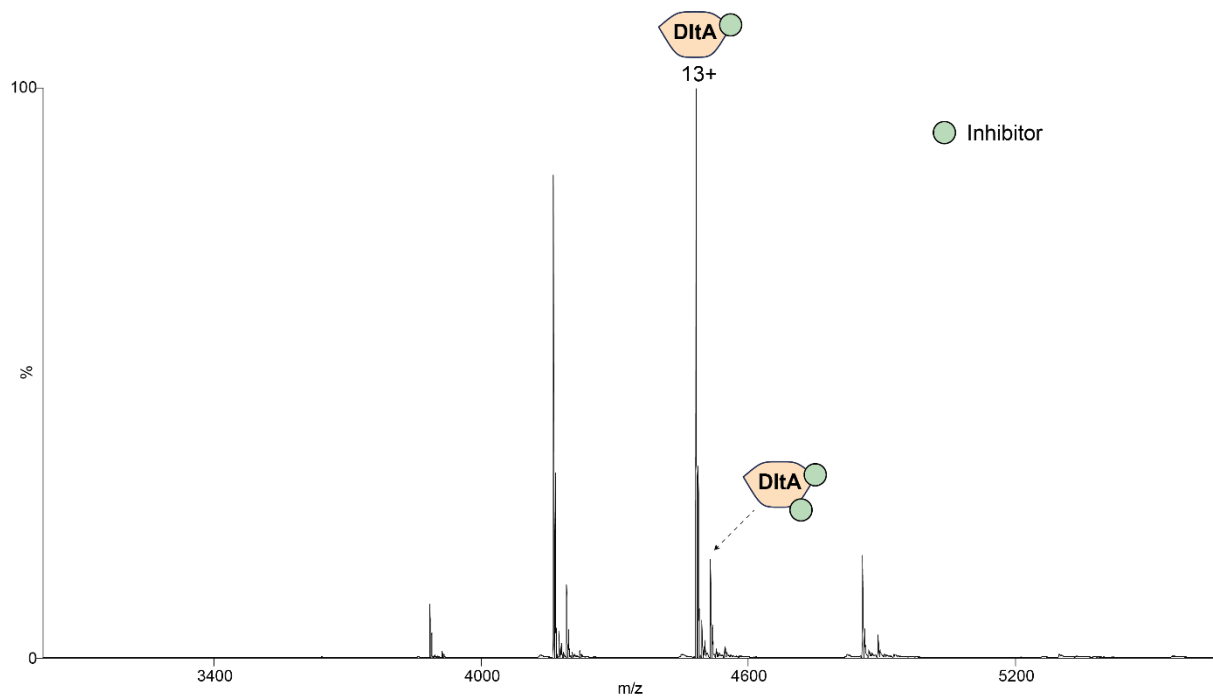

**Figure S8: Inhibitor binds avidly to DltA.** Mass spectrum of DltA with its inhibitor (5'-O-[N-(D-alanyl)-sulfamoyl]adenosine). The spectrum displays mostly protein bound to the inhibitor, with no *apo* protein, suggesting a strong affinity. Theoretical and measured masses are listed in Table S3.

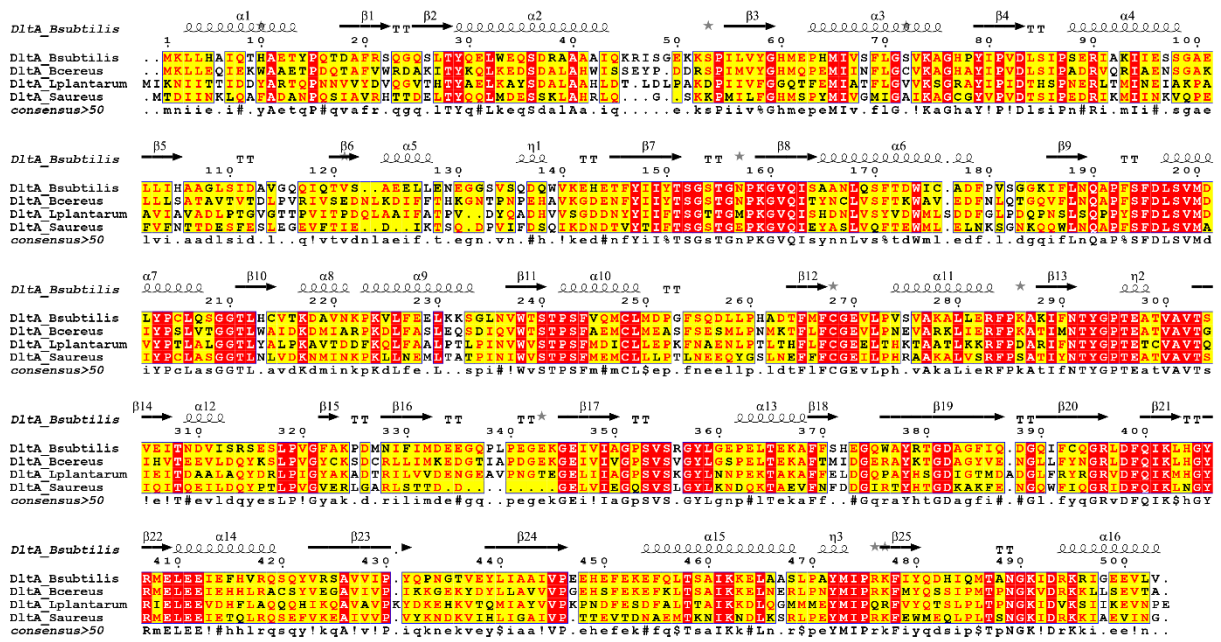

**Figure S9: Multiple sequence alignment for *B. subtilis* DltA compared to other species.** Sequence alignment of *B. subtilis* DltA with DltA from *Bacillus cereus* (*Bcereus*), *Lactobacillus plantarum* (*Lplantarum*), and *Staphylococcus aureus* (*Saureus*). Most of the conserved residues were located in the P-Loop region (Residue 151-160) and binding pockets (Residue 265-270 and 291-297).

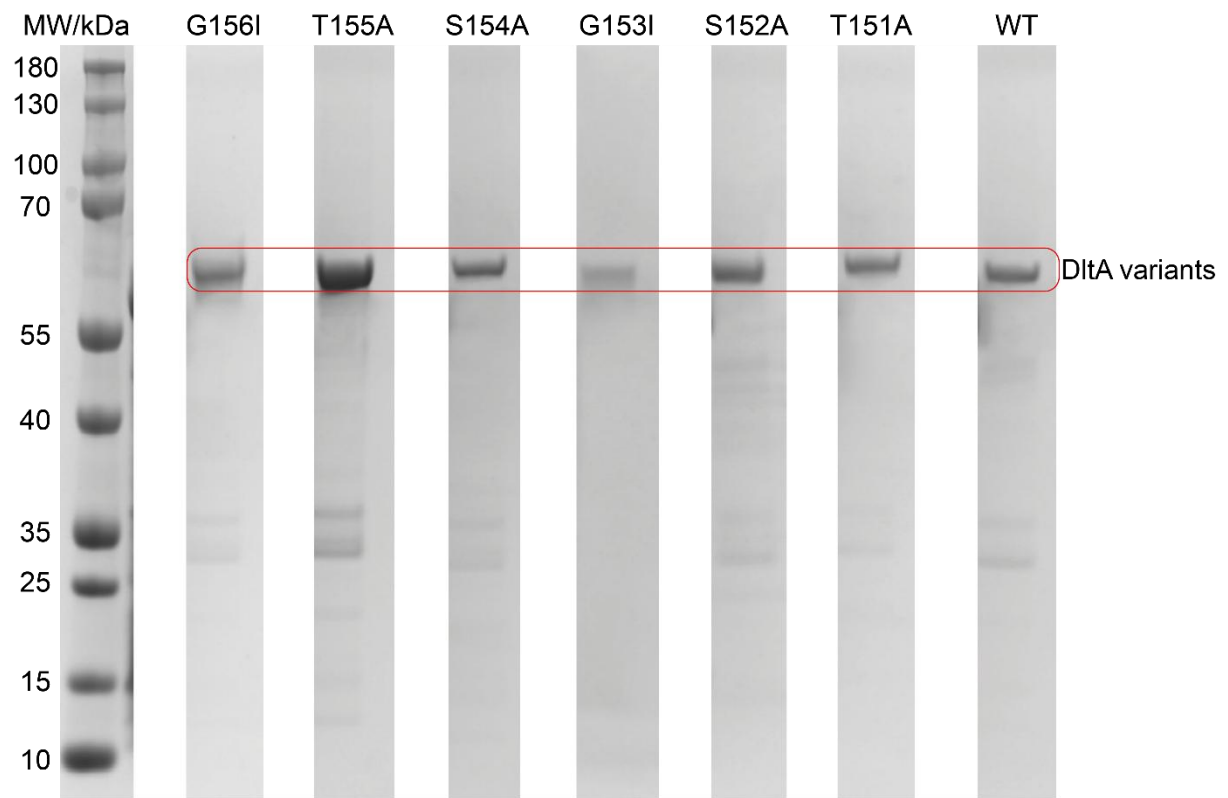

**Figure S10: Purification of DltA P-loop mutants.** SDS-PAGE analyses of purified DltA P-loop mutants show similar purity to the wild type.

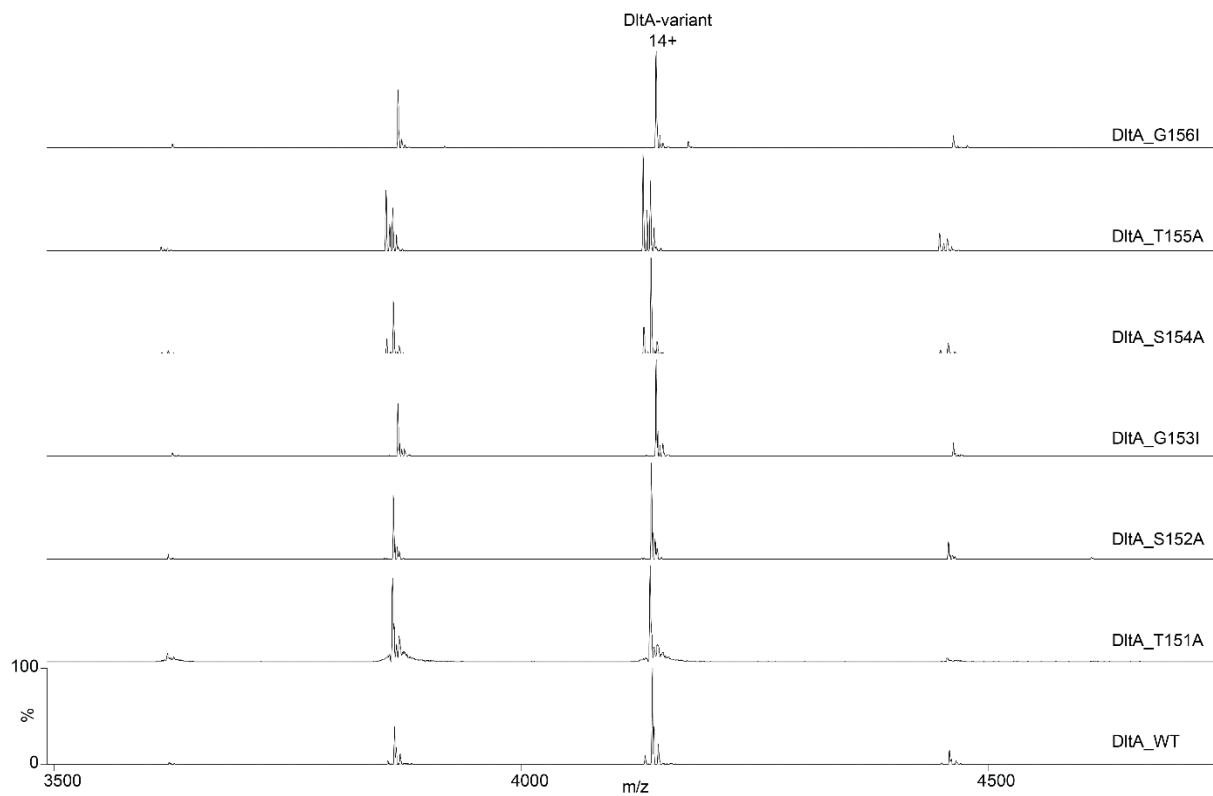

**Figure S11: Native MS analyses of the purified DltA P-loop mutants.** Mass spectra of DltA P-loop mutants. Heterogeneity in the case of S154A and T155A mutants is due to the presence of Tris. Theoretical and measured masses are listed in Table S2.

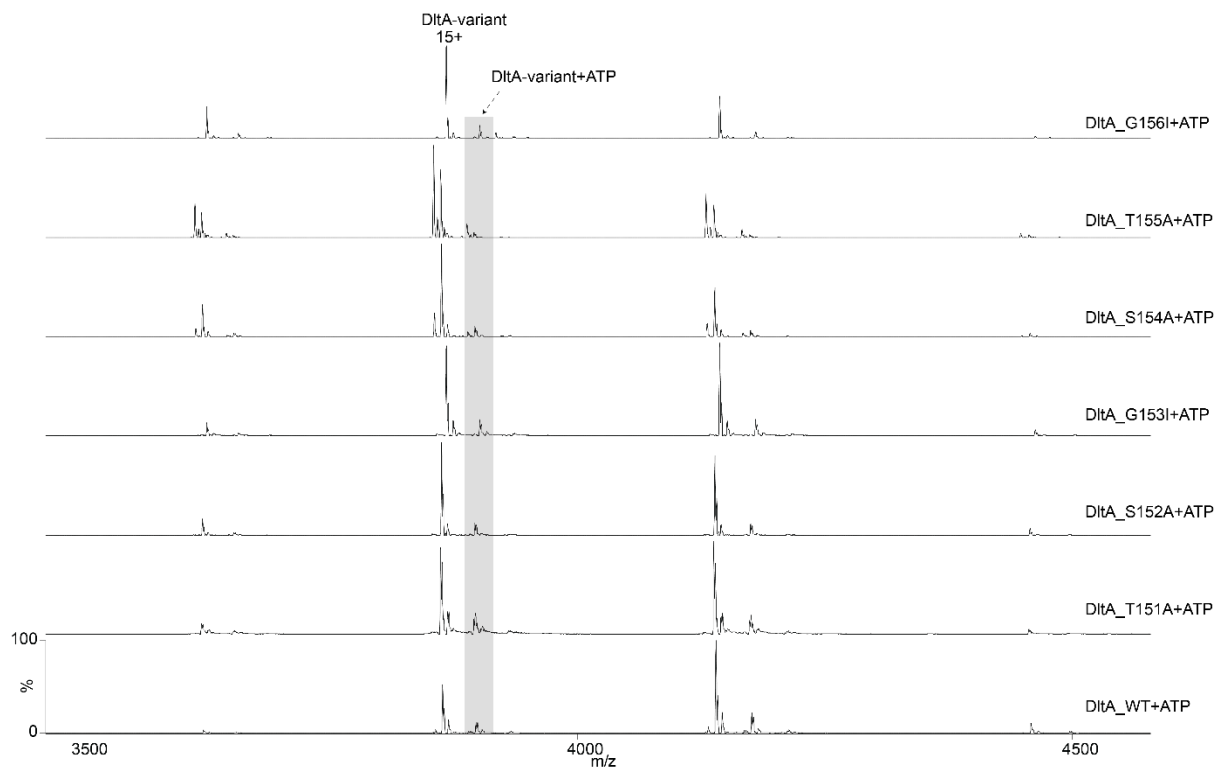

**Figure S12: ATP binds non-covalently to all DltA P-loop mutants.** Spectra of DltA mutants in the presence of ATP display their non-covalent binding abilities with ATP. Theoretical and measured masses are listed in Table S2.

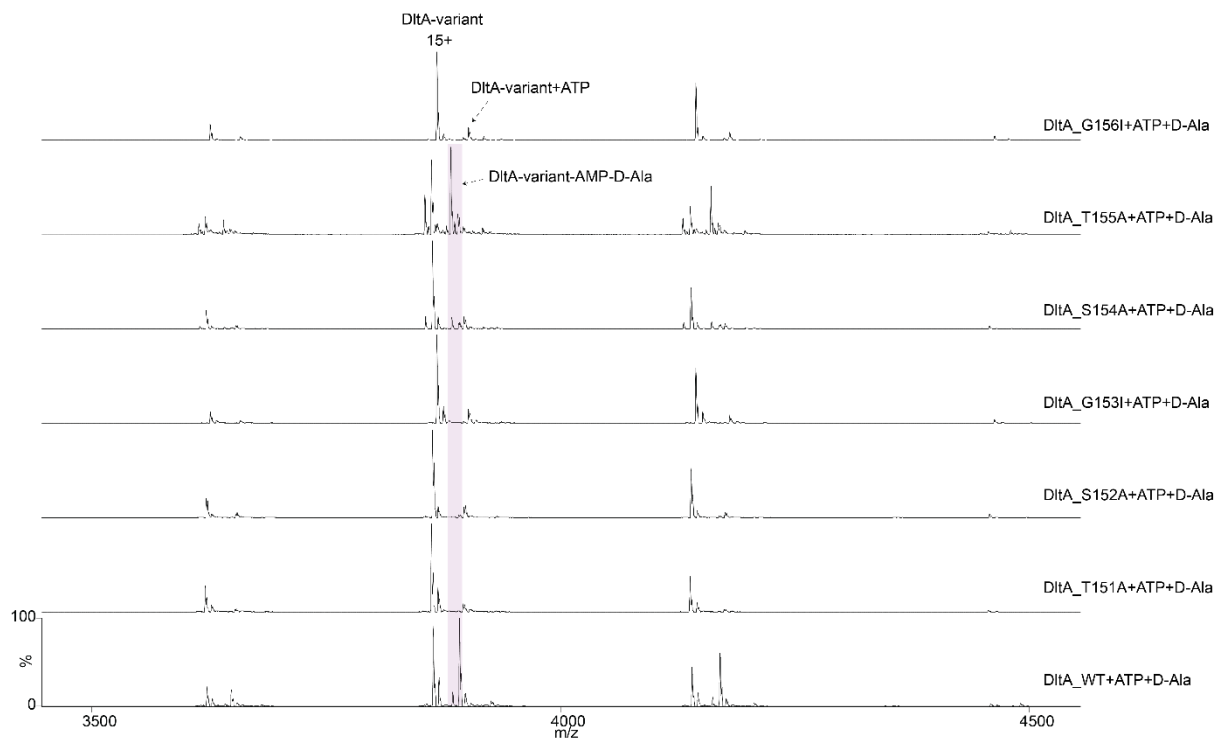

**Figure S13: Adenylation activities of DltA mutants.** Spectra of DltA mutants in the presence of ATP and D-Ala. AMP-D-Ala intermediate formation can only be observed clearly in the case of the wild type, S154A, and T155A, but with little to no in other cases. Theoretical and measured masses are listed in Table S2.

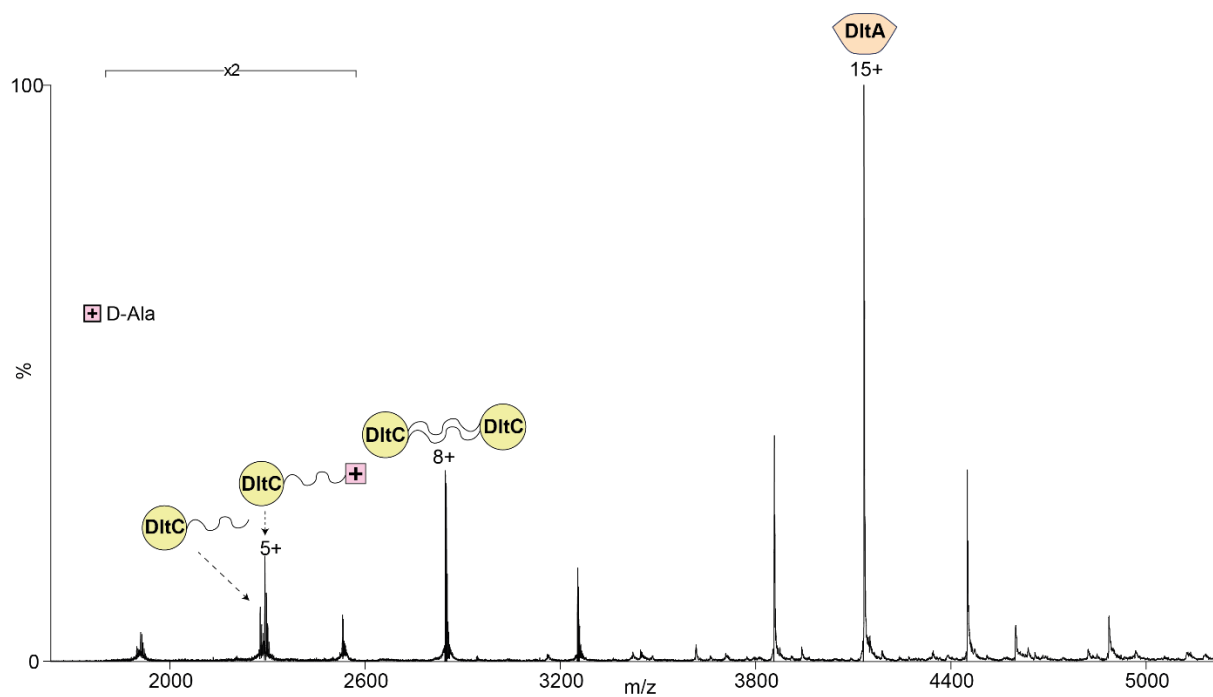

**Figure S14: Transfer of D-Ala to DltC.** Mass spectrum of the coupled reaction between DltA and DltC displays peaks of DltC with DltC-P-pant, DltC-P-pant-D-Ala, consistent with efficient transfer to D-Ala. Theoretical and measured masses are listed in Table S3.

**Table S1: Sequences of primers used for generating DltA mutants.**

|                       |              |                |                                                    |
|-----------------------|--------------|----------------|----------------------------------------------------|
| <b>P-Loop mutants</b> | <b>T151A</b> | <b>Forward</b> | 5' atcatttatgcaagcggctcaacaggaaatccaagggcgtc 3'    |
|                       |              | <b>Reverse</b> | 5' tgttgagccgcttgataaatgatatagaaggttcgtgctcctt 3'  |
|                       | <b>S152A</b> | <b>Forward</b> | 5' atttatacagccggctcaacaggaaatccaagggcgtccag 3'    |
|                       |              | <b>Reverse</b> | 5' tcctgttgagccgctgtataaatgatatagaaggttcgtgctc 3'  |
|                       | <b>G153I</b> | <b>Forward</b> | 5' tatacaagcatctcaacaggaaatccaagggcgtccagatt 3'    |
|                       |              | <b>Reverse</b> | 5' atttctgttgagatgctgtataaatgatatagaaggttcgtg 3'   |
|                       | <b>S154A</b> | <b>Forward</b> | 5' acaagcggcgcaacaggaaatccaagggcgtccagattca 3'     |
|                       |              | <b>Reverse</b> | 5' cggatttctgttgccgctgtataaatgatatagaaggttc 3'     |
|                       | <b>T155A</b> | <b>Forward</b> | 5' agcggctcagcaggaatccaagggcgtccagattcagcg 3'      |
|                       |              | <b>Reverse</b> | 5' cttcggatttctgctgagccgctgtataaatgatatagaaggt 3'  |
|                       | <b>G156I</b> | <b>Forward</b> | 5' ggctcaacaataatccaagggcgtccagattcagcggcg 3'      |
|                       |              | <b>Reverse</b> | 5' gcccttcggatttattgttgagccgctgtataaatgatatagaa 3' |
|                       | <b>P158A</b> | <b>Forward</b> | 5' acaggaaatcgaagggcgtccagattcagcggcgaattta 3'     |
|                       |              | <b>Reverse</b> | 5' ctggacgcccttcgatttctgttgagccgctgtataaatgat 3'   |
|                       | <b>K159A</b> | <b>Forward</b> | 5' ggaatccggcggcggtccagattcagcggcgaatttacag 3'     |
|                       |              | <b>Reverse</b> | 5' aatctggacgcccggttctgttgagccgctgtataaat 3'       |

**Table S2: Expected and measured masses for P-Loop mutants constructs**

| <b>Construct</b>       | <b>Calculated mass (Da)</b> | <b>Observed mass (Da)</b> | <b>Relevant figure</b>                 |
|------------------------|-----------------------------|---------------------------|----------------------------------------|
| DltA WT                | 57842                       | 57949±1.22                | Fig S1, Fig S2                         |
| T151A                  | 57811                       | 57917±0.38                | Fig 3, Fig 5, Fig S1, Fig S8, Fig S9   |
| S152A                  | 57825                       | 57933±3.63                | Fig 3, Fig 5, Fig S1, Fig S8, Fig S9   |
| G153I                  | 57897                       | 58005±3.02                | Fig 3, Fig 5, Fig S1, Fig S8, Fig S9   |
| S154A                  | 57825                       | 57931±0.08                | Fig 3, Fig 5, Fig S1, Fig S8, Fig S9   |
| T155A                  | 57811                       | 57812±0.72<br>57920±0.27  | Fig 3, Fig 5, Fig S1, Fig S8, Fig S9   |
| G156I                  | 57897                       | 58006±1.54                | Fig 3, Fig 5, Fig S1, Fig S8, Fig S9   |
| DltA-T151A + ATP       | 58425                       | 58447±0.3                 | Fig 3, Fig 5, Fig S8, Fig S10, Fig S11 |
| DltA-S152A + ATP       | 58439                       | 58440±0.33                | Fig 3, Fig 5, Fig S8, Fig S10, Fig S11 |
| DltA-G153I + ATP       | 58511                       | 58511±0.03                | Fig 3, Fig 5, Fig S8, Fig S10, Fig S11 |
| DltA-S154A + ATP       | 57439                       | 58440±0.35                | Fig 3, Fig 5, Fig S8, Fig S10, Fig S11 |
| DltA-T155A + ATP       | 58318                       | 58318±0.13                | Fig 3, Fig 5, Fig S8, Fig S10, Fig S11 |
| DltA-G156I + ATP       | 58511                       | 58512±0.91                | Fig 3, Fig 5, Fig S8, Fig S10, Fig S11 |
| DltA-S154A + AMP-D-Ala | 58352                       | 58441±0.69                | Fig 3, Fig 5, Fig S8, Fig S10, Fig S11 |
| DltA-T155A + AMP-D-Ala | 58230                       | 58230±0.65                | Fig 3, Fig 5, Fig S8, Fig S10, Fig S11 |

**Table S3: Expected and observed masses for protein reactions and products**

| <b>Construct</b>    | <b>Calculated mass (Da)</b> | <b>Observed mass (Da)</b> | <b>Relevant figure</b> |
|---------------------|-----------------------------|---------------------------|------------------------|
| DltA WT + ATP       | 58349                       | 58456±0.17                | Fig S4                 |
| DltA WT + D-Ala     | 57931                       | 58137±5.87                | Fig S4                 |
| DltA WT + AMP-D-Ala | 58278                       | 58367±0.09                | Fig 2, Fig 3           |
| DltA WT + Inhibitor | 58259                       | 58260±2.72                | Fig 2, Fig S6          |
| DltC Monomer        | 11042                       | 11043±0.2                 | Fig 1, Fig S3          |
| DltC + Ppant        | 11400                       | 11380±0.32                | Fig 1, Fig 4, Fig S3   |
| DltC + Ppant-D-Ala  | 11471                       | 11452±1.02                | Fig 4, Fig 5           |

Unedited SDS-PAGE gel images that were used to make Supplementary Figure S1.

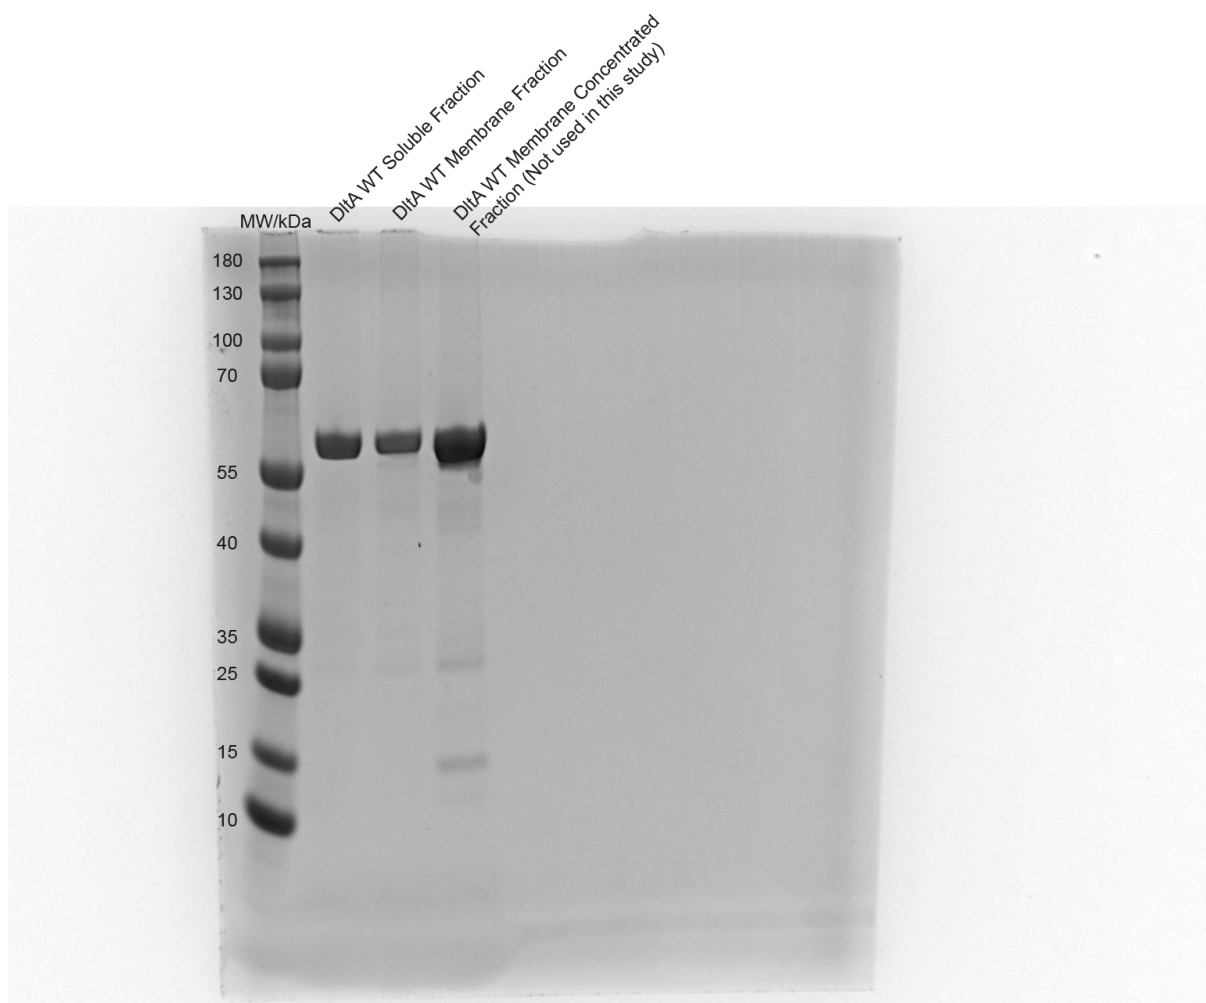

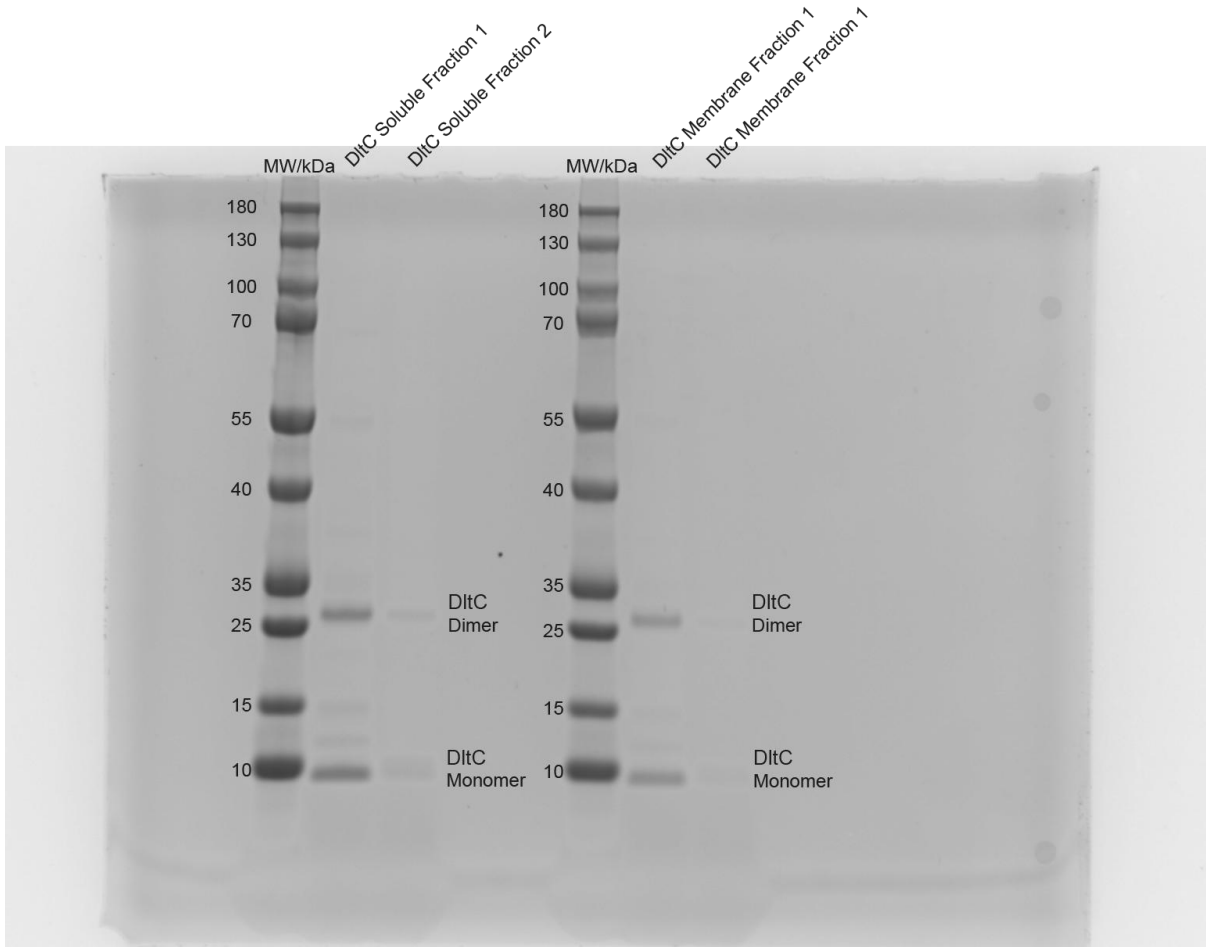

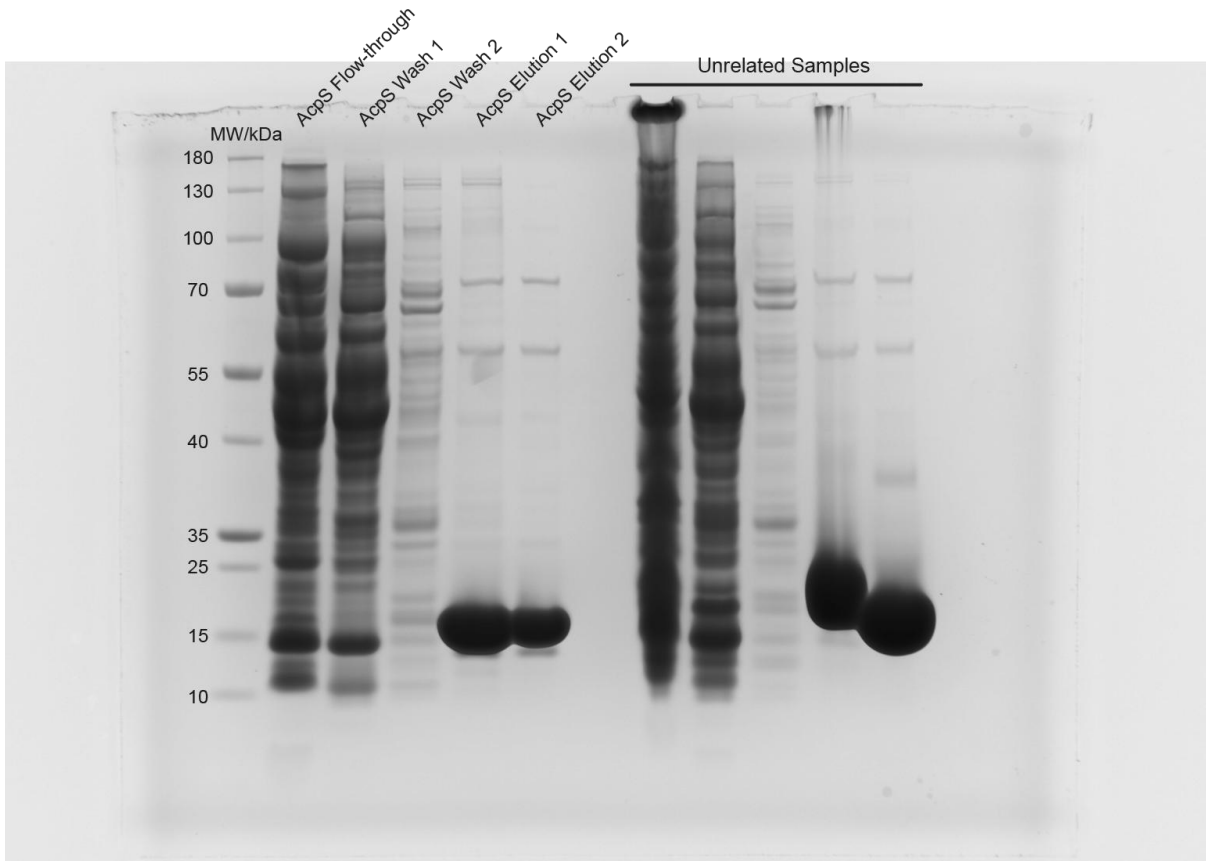

Unedited SDS-PAGE gel images that were used to make Supplementary Figure S10

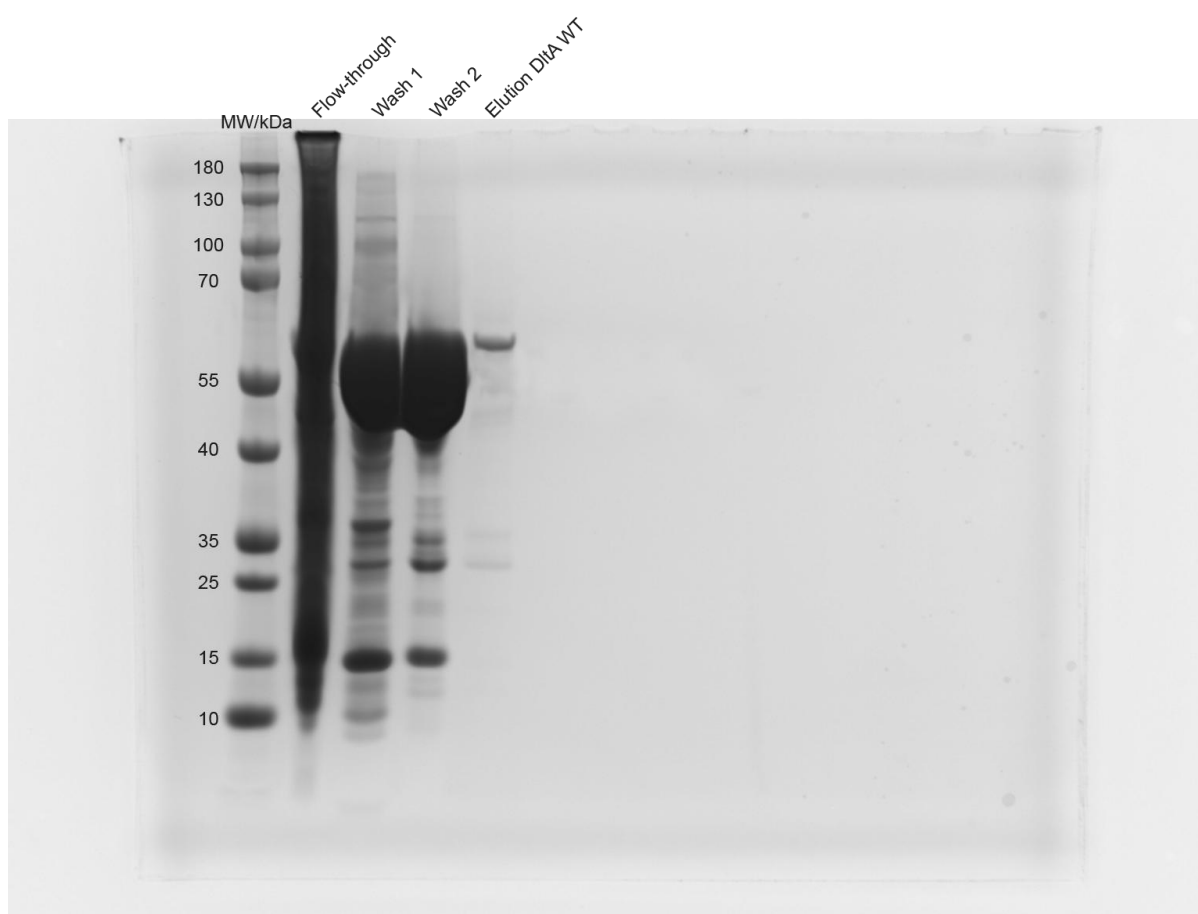

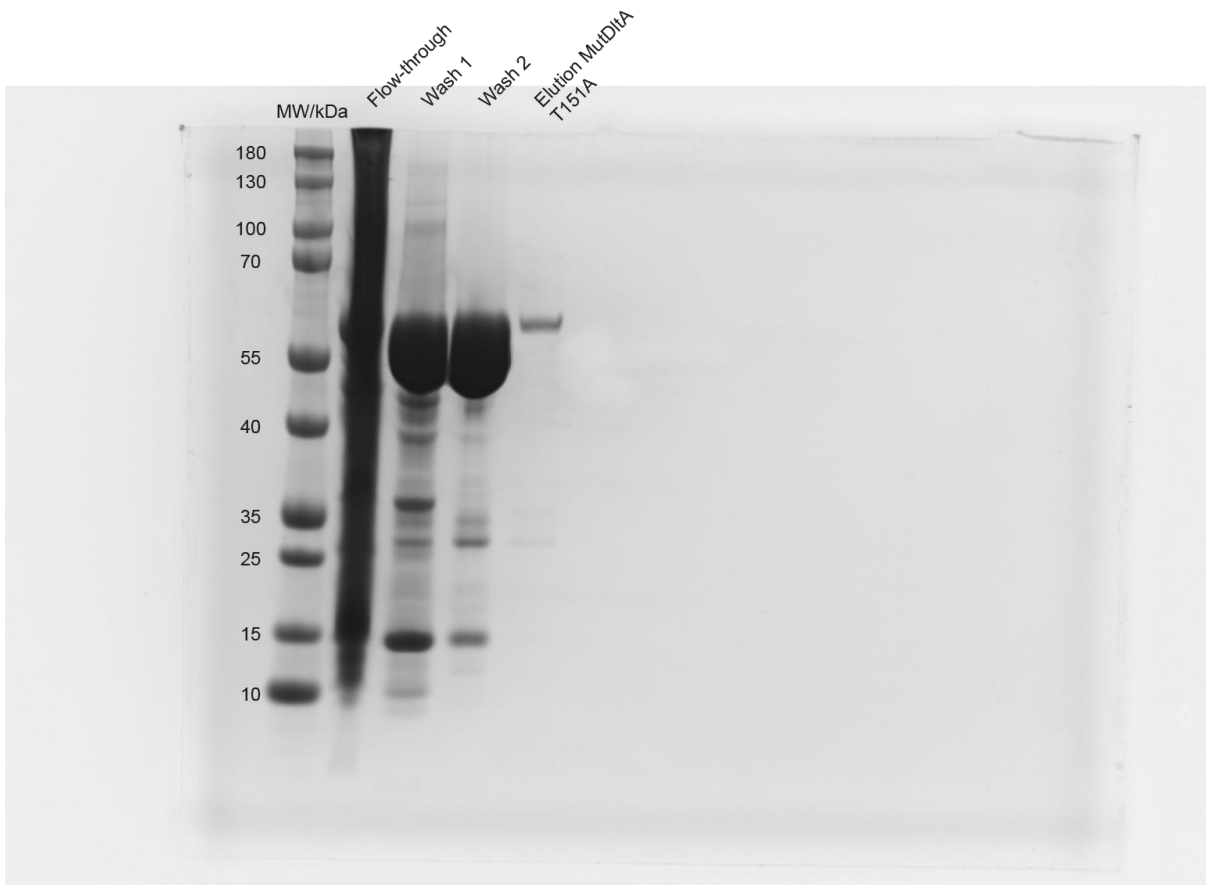

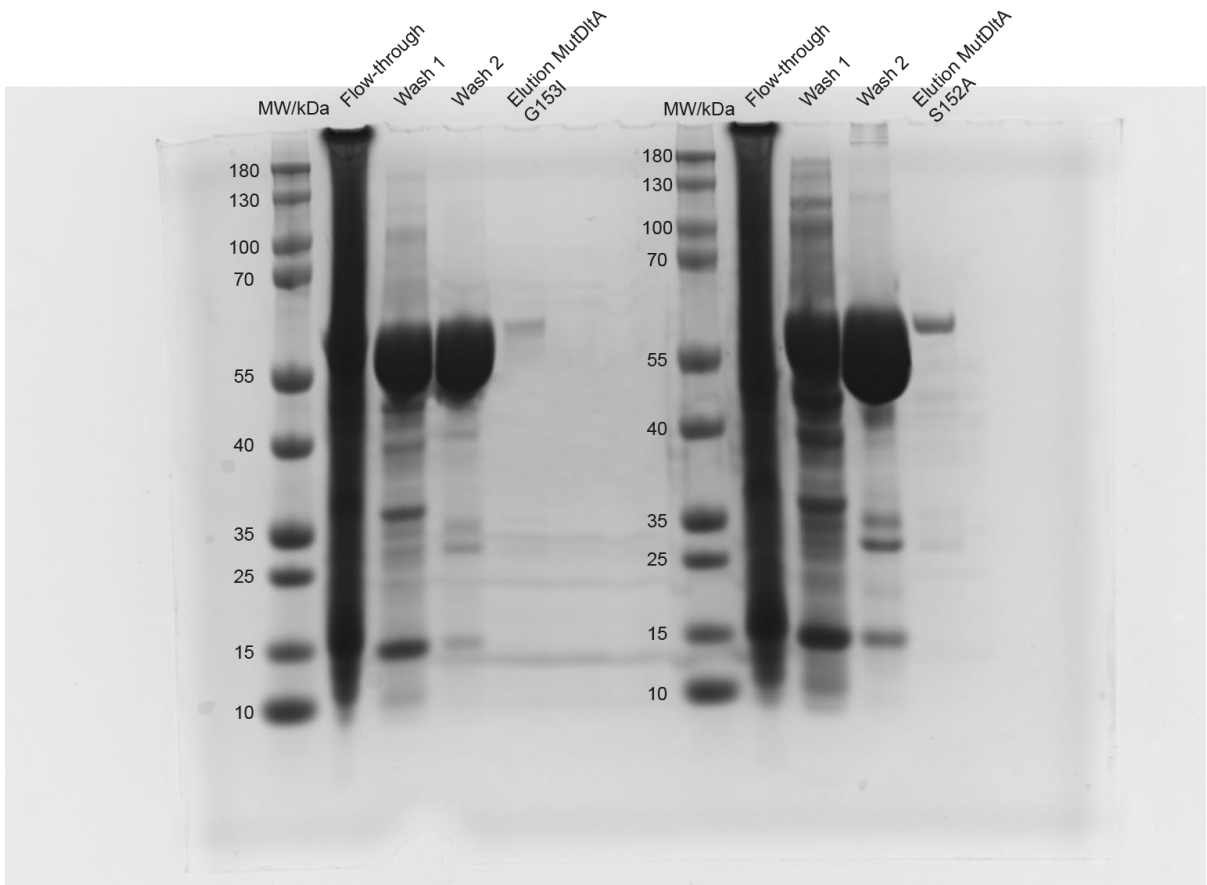

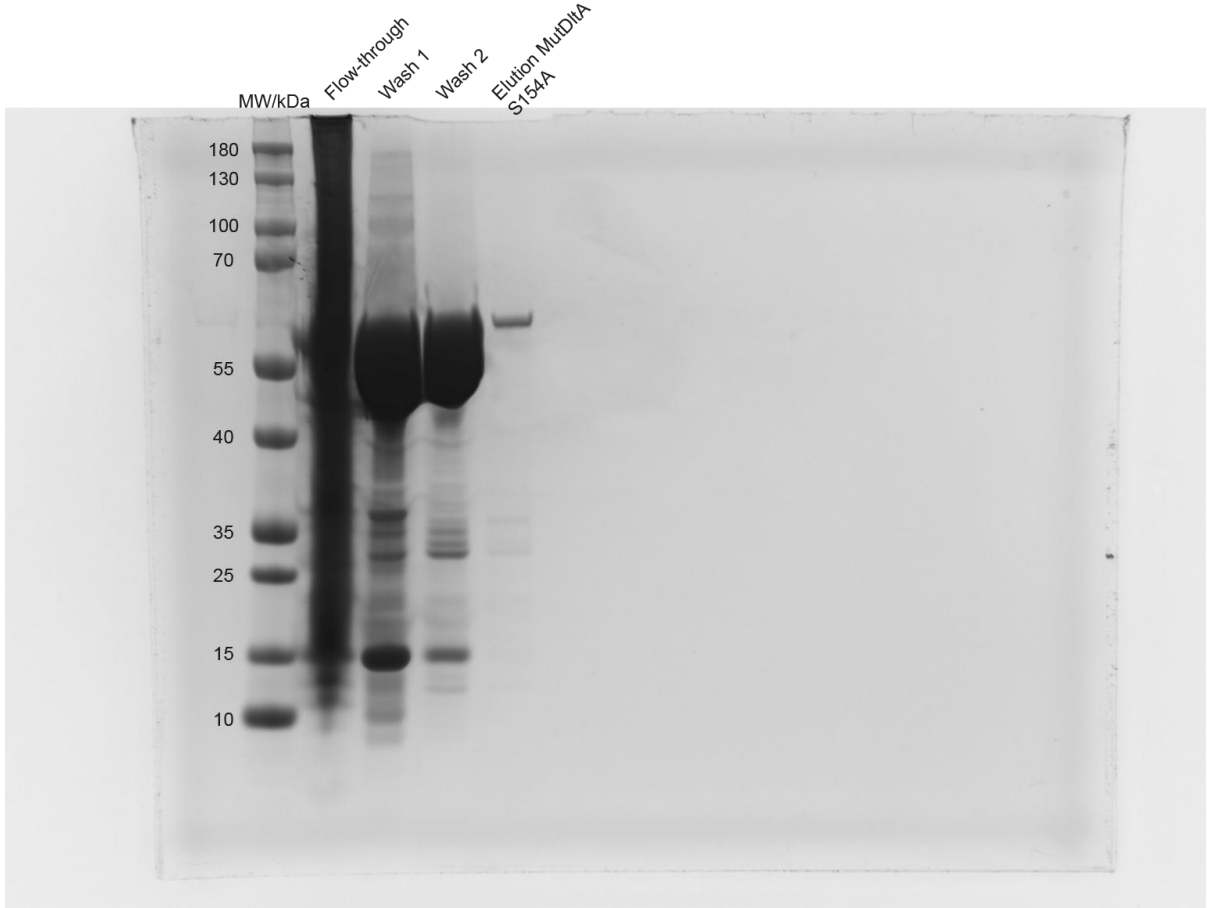

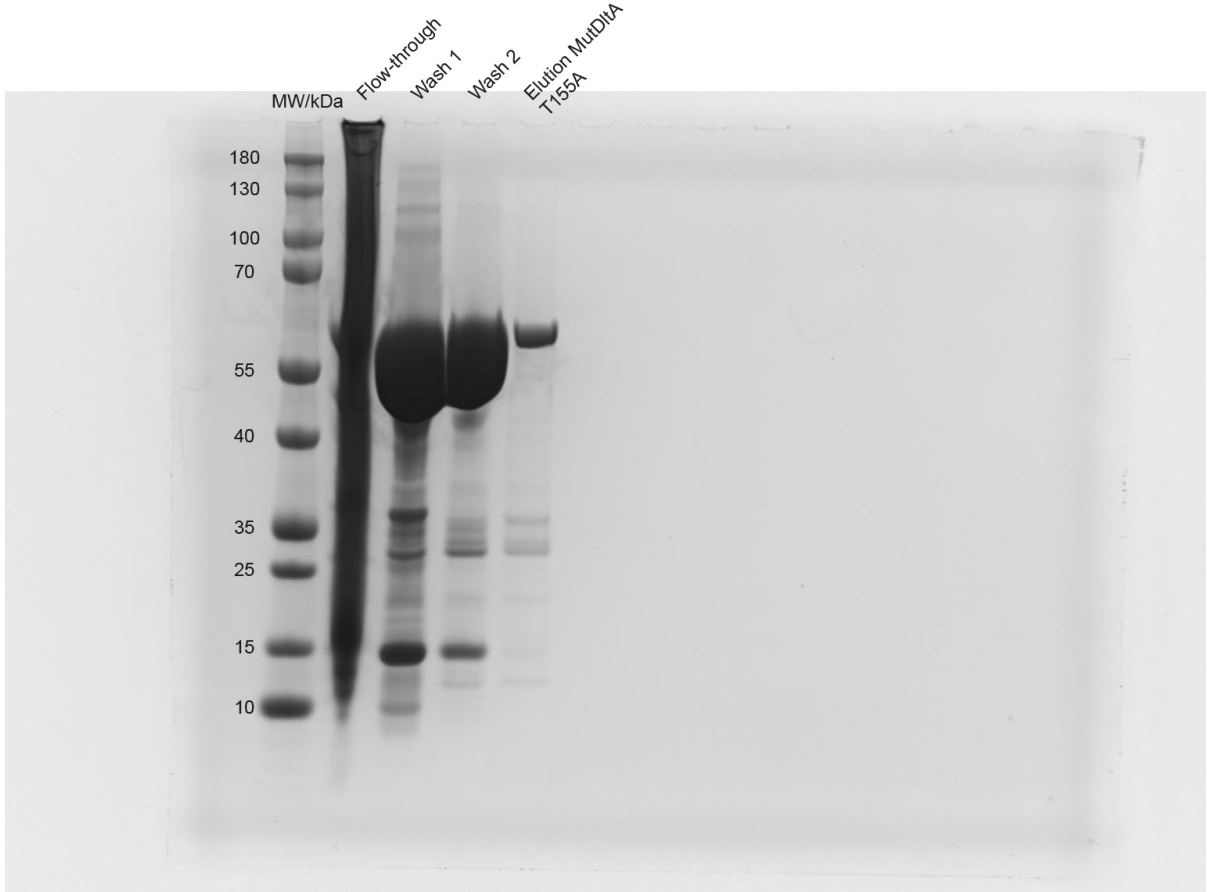

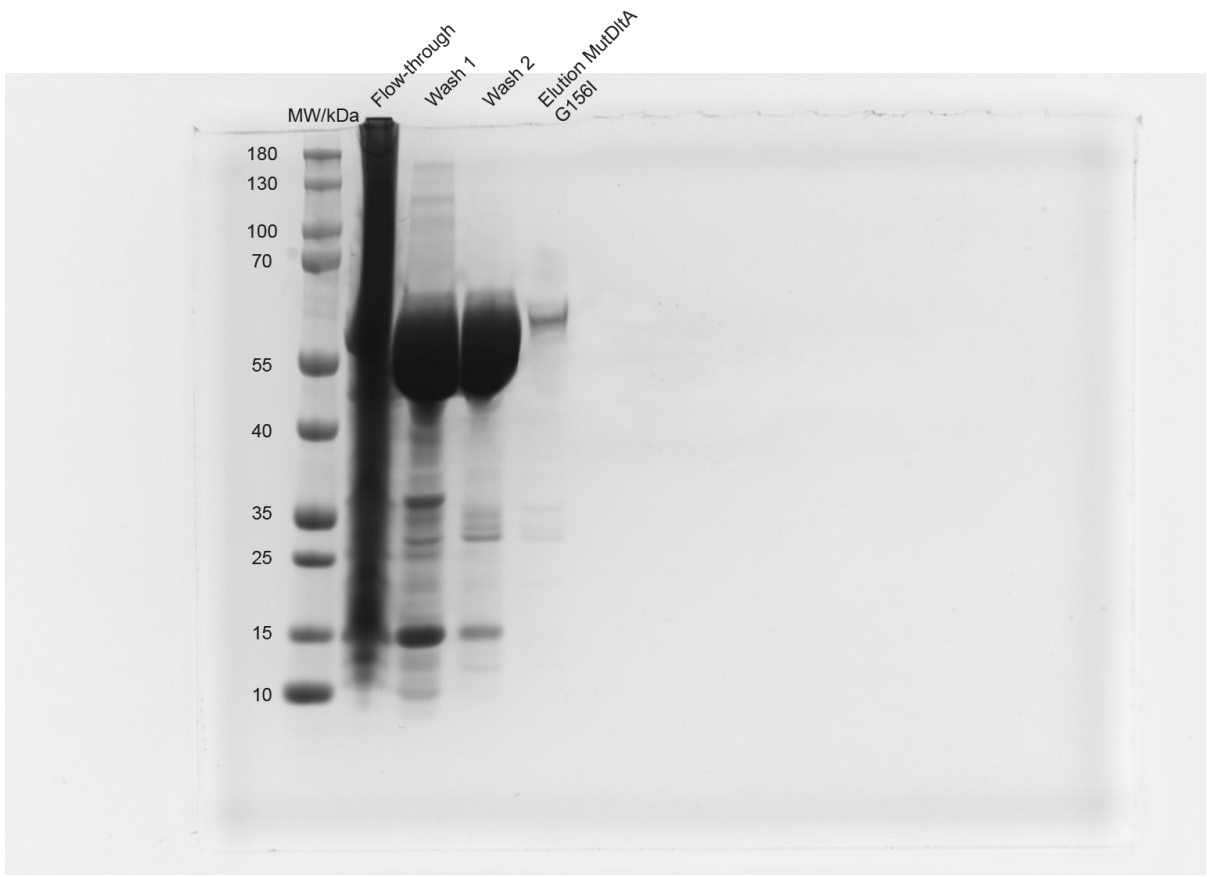

Supplement: d6ra04213a1.pdf [file d6ra04213a1.pdf]
